# Supplementary material
Source: publisher figshare collection journal article supplement (https://tandf.figshare.com/ndownloader/files/16261949)
Supplement: Supplementary file 1 [file 16261949]

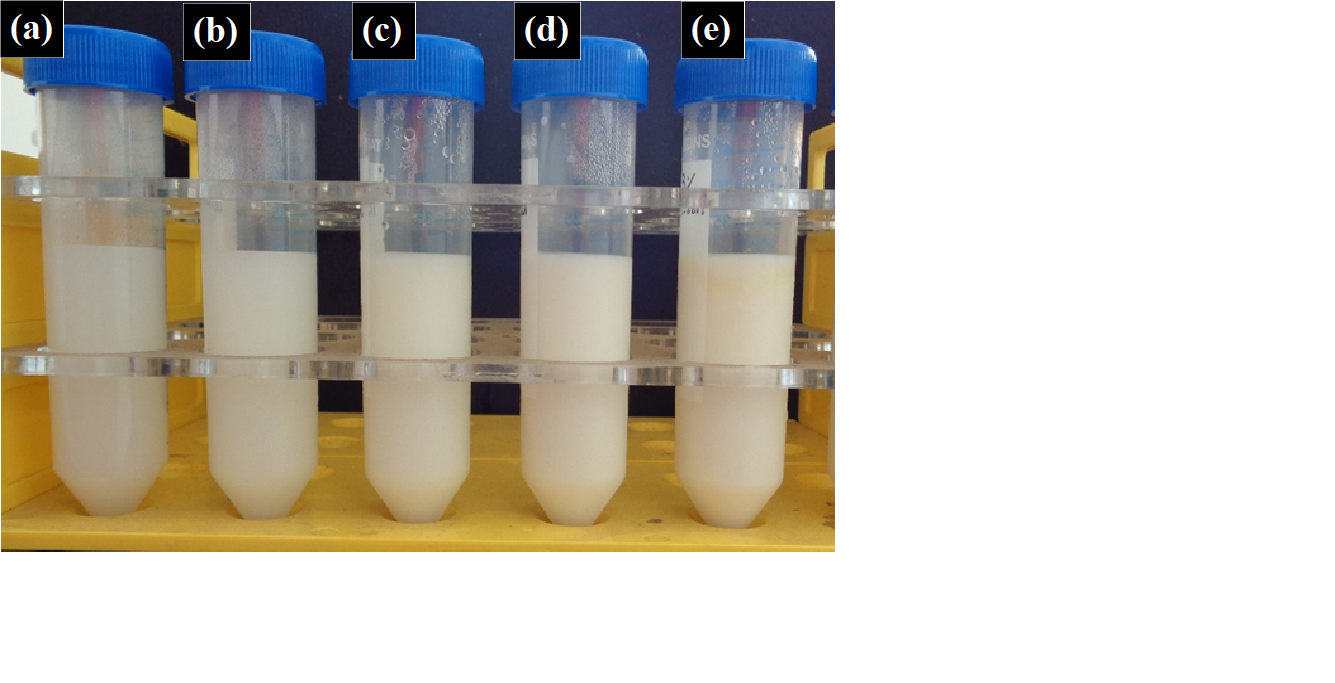


**Figure S1**. Pictographs of the prepared emulsions. (a) S1, (b) S2, (c) S3, (d) S4, and (e) S5.


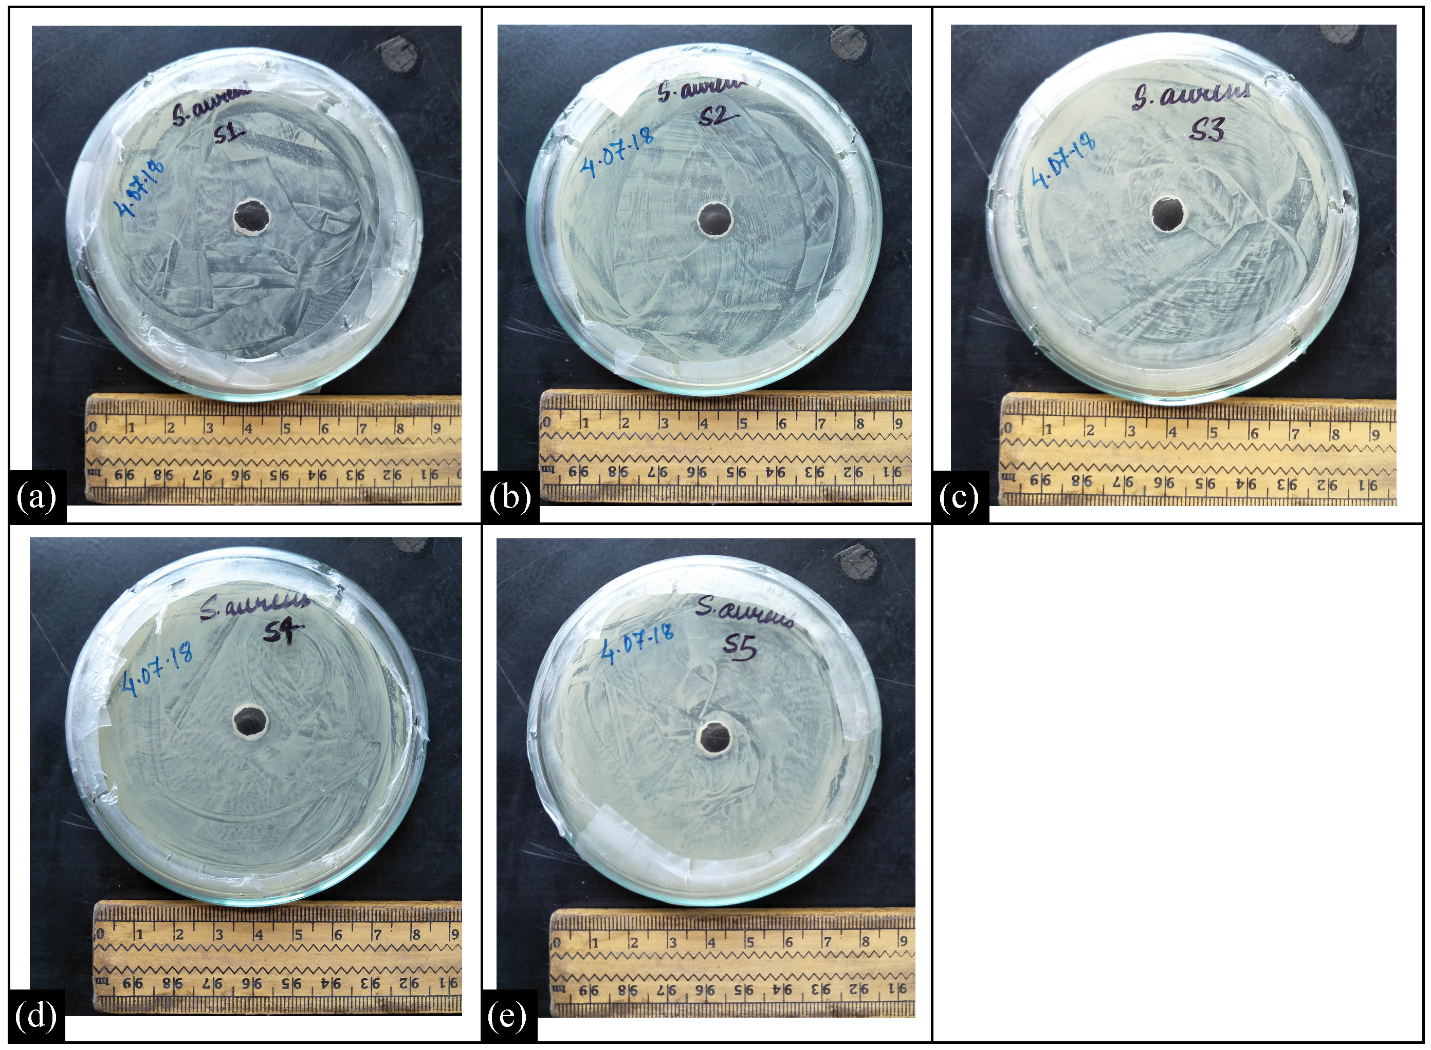


**Figure S2.** Antimicrobial efficacy tests of blank samples (a) S1, (b) S2, (c), S3, (d) S4, and (e) S5.


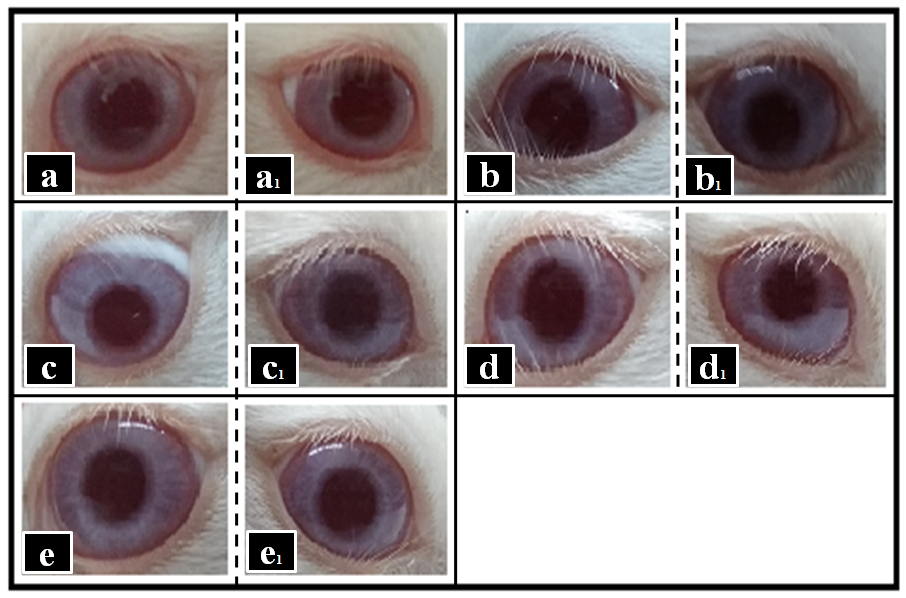


**Figure S3a:** Eye irritation test conducted in rabbit model as per Draize rabbit eye irritation test protocol. Representative pictures of the eye administered with S1: (a) Left eye administered with normal saline at 0 h, (a1) Right eye administered with S1 at 0 h, (b) Left eye administered with normal saline at 1 h, (b1) Right eye administered with S1 at 1 h, (c) Left eye administered with normal saline at 24 h, (c1) Right eye administered with S1 at 24 h, (d) Left eye administered with normal saline at 48 h, (d1) Right eye administered with S1 at 48 h, (e) Left eye administered with normal saline at 72 h, and (e1) Right eye administered with S1 at 72 h.


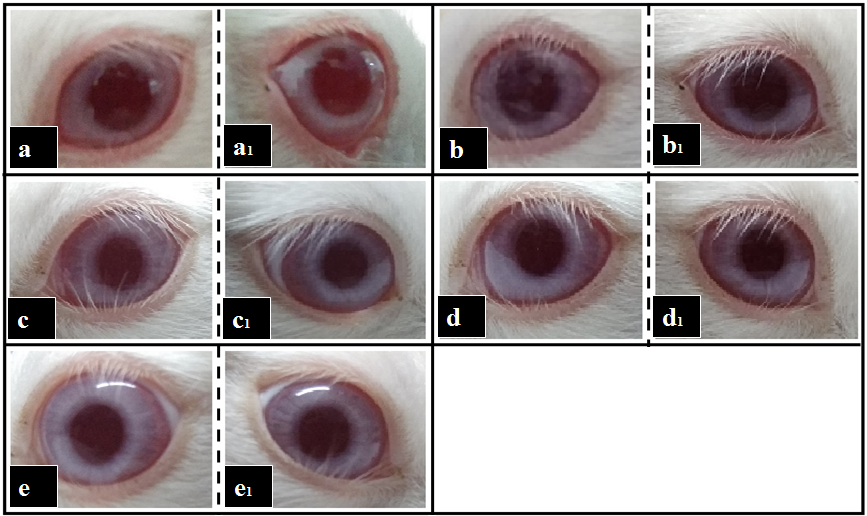


**Figure S3b:** Eye irritation test conducted in rabbit model as per Draize rabbit eye irritation test protocol. Representative pictures of the eye administered with S2: (a) Left eye administered with normal saline at 0 h, (a1) Right eye administered with S2 at 0 h, (b) Left eye administered with normal saline at 1 h, (b1) Right eye administered with S2 at 1 h, (c) Left eye administered with normal saline at 24 h, (c1) Right eye administered with S2 at 24 h, (d) Left eye administered with normal saline at 48 h, (d1) Right eye administered with S2 at 48 h, (e) Left eye administered with normal saline at 72 h, and (e1) Right eye administered with S2 at 72 h.


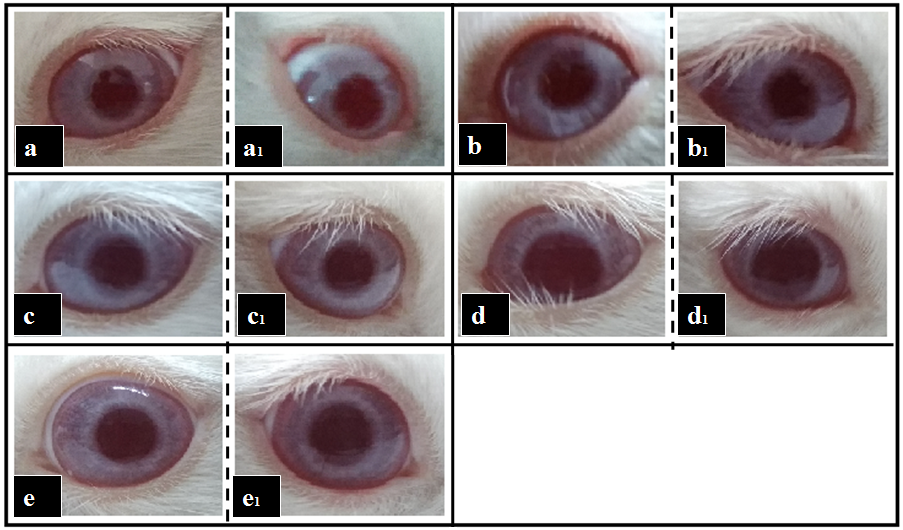


**Figure S3c:** Eye irritation test conducted in rabbit model as per Draize rabbit eye irritation test protocol. Representative pictures of the eye administered with S3: (a) Left eye administered with normal saline at 0 h, (a1) Right eye administered with S3 at 0 h, (b) Left eye administered with normal saline at 1 h, (b1) Right eye administered with S3 at 1 h, (c) Left eye administered with normal saline at 24 h, (c1) Right eye administered with S3 at 24 h, (d) Left eye administered with normal saline at 48 h, (d1) Right eye administered with S3 at 48 h, (e) Left eye administered with normal saline at 72 h, and (e1) Right eye administered with S3 at 72 h.


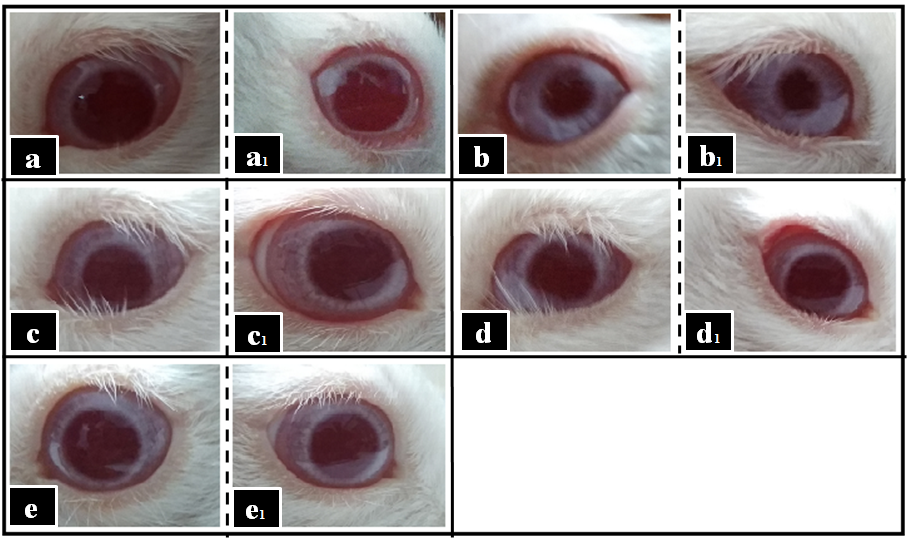


**Figure S3d:** Eye irritation test conducted in rabbit model as per Draize rabbit eye irritation test protocol. Representative pictures of the eye administered with S4: (a) Left eye administered with normal saline at 0 h, (a1) Right eye administered with S4 at 0 h, (b) Left eye administered with normal saline at 1 h, (b1) Right eye administered with S4 at 1 h, (c) Left eye administered with normal saline at 24 h, (c1) Right eye administered with S4 at 24 h, (d) Left eye administered with normal saline at 48 h, (d1) Right eye administered with S4 at 48 h, (e) Left eye administered with normal saline at 72 h, and (e1) Right eye administered with S4 at 72 h.

**Calculation of apparent permeability coefficient (Papp) and Steady state flux (Jss)**

Apparent permeability coefficient and steady-state flux were calculated using the following equations

Papp (cm/s) = (∆Q/ ∆t)*(1**/** A.Co.60)

Jss (μg/cm2s) = Papp x Co

Where, ΔQ/Δt (μg/min) is the flux across the corneal tissue. A is the area of diffusion (cm2), Co (μg/cm3) is the initial concentration of the drug in donor compartment, and 60 is taken as the factor to convert minute into the second. The flux across the cornea was obtained from the slope of the regression line obtained from the linear part of the curve between the amount permeated (Q) Vs time (t) plot.

**A = 0.64 cm2, Co = 5000 μg**

**Table S1: Apparent permeability coefficient (Papp) and Steady state flux (Jss) data:**

| Formulations  Code | Apparent permeability coefficient  **Papp**  **(cm/sec)** | Steady-state flux  **Jss**  **(μg/cm2s)** |
| --- | --- | --- |
| S1 | 0.792 X 10 -6 | 3.958 X 10 -3 |
| S2 | 1.109 X 10 -6 | 5.547 X 10 -3 |
| S3 | 1.094 X 10 -6 | 5.469 X 10 -3 |
| S4 | 1.255 X 10 -6 | 6.276 X 10 -3 |
| S5 | 1.120 X 10 -6 | 5.599 X 10 -3 |
